# Supplementary material for: Universal synthesis of pure-phase IB-group Sn-based alloys with modulable electrocatalytic CO2 reduction products
Source: Royal Society of Chemistry journal article supplement (doi:10.1039/d4cc05317f), 2024-01-01
Supplement: d4cc05317f1.xlsx [file d4cc05317f1.xlsx]

## Sheet: Figure·S15
a									c										e
	Lattice type P										Lattice type P									Lattice type P
	Space group name P 1										Space group name P 1									Space group name P 1
	Space group number 1										Space group number 1									Space group number 1
	Setting number 1										Setting number 1									Setting number 1
	Lattice parameters										Lattice parameters									Lattice parameters
	a b c alpha beta gamma										a b c alpha beta gamma									a b c alpha beta gamma
	13.54690 10.31120 19.74320 90.0000 90.0000 90.0000										8.66420 11.03920 18.03240 90.0000 90.0000 90.0000									14.02740 8.64600 19.29680 90.0000 90.0000 107.9498
	Unit-cell volume = 2757.824889 Å^3										Unit-cell volume = 1724.723936 Å^3									Unit-cell volume = 2226.422066 Å^3
	Structure parameters										Structure parameters									Structure parameters
	x y z Occ. U Site Sym.										x y z Occ. U Site Sym.									x y z Occ. U Site Sym.
	1 Ag Ag1 0.00000 0.12500 0.15024 1.000 0.000 1a 1										1 Sn Sn1 0.12500 0.00000 0.04968 1.000 0.007 1a 1									1 Au Au1 0.02775 0.01388 0.00259 1.000 0.000 1a 1
	2 Ag Ag2 0.25000 0.12500 0.44736 1.000 0.000 1a 1										2 Sn Sn2 0.12500 0.00000 0.31358 1.000 0.008 1a 1									2 Au Au2 0.18517 0.34258 0.16318 1.000 0.000 1a 1
	3 Ag Ag3 0.25000 0.37500 0.05120 1.000 0.000 1a 1										3 Sn Sn3 0.37500 0.25000 0.13541 1.000 0.007 1a 1									3 Au Au3 0.34258 0.17129 0.32378 1.000 0.000 1a 1
	4 Ag Ag4 0.00000 0.37500 0.34832 1.000 0.000 1a 1										4 Sn Sn4 0.37500 0.25000 0.40105 1.000 0.009 1a 1									4 Au Au4 -0.00000 0.00000 0.48437 1.000 0.000 1a 1
	5 Ag Ag5 0.00000 0.37500 0.05290 1.000 0.000 1a 1										5 Cu Cu5 0.37500 0.00000 0.40856 1.000 0.008 1a 1									5 Au Au5 0.35646 0.42823 0.08289 1.000 0.000 1a 1
	6 Ag Ag6 0.25000 0.37500 0.35001 1.000 0.000 1a 1										6 Cu Cu6 0.37500 0.00000 0.14460 1.000 0.012 1a 1									6 Au Au6 0.01388 0.25694 0.24348 1.000 0.000 1a 1
	7 Ag Ag7 0.12286 0.37500 0.19891 1.000 0.000 1a 1										7 Cu Cu7 0.12500 0.25000 0.04120 1.000 0.011 1a 1									7 Au Au7 0.17129 0.08565 0.40407 1.000 0.000 1a 1
	8 Ag Ag8 0.37286 0.37500 0.49603 1.000 0.000 1a 1										8 Cu Cu8 0.12500 0.25000 0.30864 1.000 0.008 1a 1									8 Sn Sn8 0.49458 0.24729 0.09627 1.000 0.000 1a 1
	9 Ag Ag9 0.25000 0.12500 0.14855 1.000 0.000 1a 1										9 Cu Cu9 0.12500 0.38040 0.44822 1.000 0.012 1a 1									9 Sn Sn9 0.15199 0.07600 0.25686 1.000 0.000 1a 1
	10 Ag Ag10 0.00000 0.12500 0.44566 1.000 0.000 1a 1										10 Cu Cu10 0.12500 0.37576 0.18315 1.000 0.010 1a 1									10 Sn Sn10 0.30941 0.40471 0.41746 1.000 0.000 1a 1
	11 Ag Ag11 0.37286 0.12500 0.00253 1.000 0.000 1a 1										11 Cu Cu11 0.37500 0.37392 0.00277 1.000 0.011 1a 1									11 Sn Sn11 0.21834 0.10917 0.06951 1.000 0.000 1a 1
	12 Ag Ag12 0.12286 0.12500 0.29965 1.000 0.000 1a 1										12 Cu Cu12 0.12500 0.11960 0.44822 1.000 0.012 1a 1									12 Sn Sn12 0.37576 0.43788 0.23010 1.000 0.000 1a 1
	13 Ag Ag13 0.12714 0.12500 0.00253 1.000 0.000 1a 1										13 Cu Cu13 0.12500 0.12424 0.18315 1.000 0.010 1a 1									13 Sn Sn13 0.03317 0.26659 0.39069 1.000 0.000 1a 1
	14 Ag Ag14 0.37714 0.12500 0.29965 1.000 0.000 1a 1										14 Cu Cu14 0.37500 0.12608 0.00277 1.000 0.011 1a 1									14 Au Au14 0.52775 0.01388 0.00259 1.000 0.000 1a 1
	15 Ag Ag15 0.50000 0.12500 0.15024 1.000 0.000 1a 1										15 Cu Cu15 0.37500 0.37355 0.26727 1.000 0.010 1a 1									15 Au Au15 0.68517 0.34258 0.16318 1.000 0.000 1a 1
	16 Ag Ag16 0.75000 0.12500 0.44736 1.000 0.000 1a 1										16 Cu Cu16 0.37500 0.12646 0.26727 1.000 0.010 1a 1									16 Au Au16 0.84258 0.17129 0.32378 1.000 0.000 1a 1
	17 Ag Ag17 0.75000 0.37500 0.05120 1.000 0.000 1a 1										17 Sn Sn17 0.62500 0.00000 0.04968 1.000 0.007 1a 1									17 Au Au17 0.50000 -0.00000 0.48437 1.000 0.000 1a 1
	18 Ag Ag18 0.50000 0.37500 0.34832 1.000 0.000 1a 1										18 Sn Sn18 0.62500 0.00000 0.31358 1.000 0.008 1a 1									18 Au Au18 0.85646 0.42823 0.08289 1.000 0.000 1a 1
	19 Ag Ag19 0.50000 0.37500 0.05290 1.000 0.000 1a 1										19 Sn Sn19 0.87500 0.25000 0.13541 1.000 0.007 1a 1									19 Au Au19 0.51388 0.25694 0.24348 1.000 0.000 1a 1
	20 Ag Ag20 0.75000 0.37500 0.35001 1.000 0.000 1a 1										20 Sn Sn20 0.87500 0.25000 0.40105 1.000 0.009 1a 1									20 Au Au20 0.67129 0.08565 0.40407 1.000 0.000 1a 1
	21 Ag Ag21 0.62286 0.37500 0.19891 1.000 0.000 1a 1										21 Cu Cu21 0.87500 0.00000 0.40856 1.000 0.008 1a 1									21 Sn Sn21 0.99458 0.24729 0.09627 1.000 0.000 1a 1
	22 Ag Ag22 0.87286 0.37500 0.49603 1.000 0.000 1a 1										22 Cu Cu22 0.87500 0.00000 0.14460 1.000 0.012 1a 1									22 Sn Sn22 0.65199 0.07600 0.25686 1.000 0.000 1a 1
	23 Ag Ag23 0.75000 0.12500 0.14855 1.000 0.000 1a 1										23 Cu Cu23 0.62500 0.25000 0.04120 1.000 0.011 1a 1									23 Sn Sn23 0.80941 0.40471 0.41746 1.000 0.000 1a 1
	24 Ag Ag24 0.50000 0.12500 0.44566 1.000 0.000 1a 1										24 Cu Cu24 0.62500 0.25000 0.30864 1.000 0.008 1a 1									24 Sn Sn24 0.71834 0.10917 0.06951 1.000 0.000 1a 1
	25 Ag Ag25 0.87286 0.12500 0.00253 1.000 0.000 1a 1										25 Cu Cu25 0.62500 0.38040 0.44822 1.000 0.012 1a 1									25 Sn Sn25 0.87576 0.43788 0.23010 1.000 0.000 1a 1
	26 Ag Ag26 0.62286 0.12500 0.29965 1.000 0.000 1a 1										26 Cu Cu26 0.62500 0.37576 0.18315 1.000 0.010 1a 1									26 Sn Sn26 0.53317 0.26659 0.39069 1.000 0.000 1a 1
	27 Ag Ag27 0.62714 0.12500 0.00253 1.000 0.000 1a 1										27 Cu Cu27 0.87500 0.37392 0.00277 1.000 0.011 1a 1									27 Au Au27 0.02775 0.51388 0.00259 1.000 0.000 1a 1
	28 Ag Ag28 0.87714 0.12500 0.29965 1.000 0.000 1a 1										28 Cu Cu28 0.62500 0.11960 0.44822 1.000 0.012 1a 1									28 Au Au28 0.18517 0.84258 0.16318 1.000 0.000 1a 1
	29 Ag Ag29 0.00000 0.62500 0.15024 1.000 0.000 1a 1										29 Cu Cu29 0.62500 0.12424 0.18315 1.000 0.010 1a 1									29 Au Au29 0.34258 0.67129 0.32378 1.000 0.000 1a 1
	30 Ag Ag30 0.25000 0.62500 0.44736 1.000 0.000 1a 1										30 Cu Cu30 0.87500 0.12608 0.00277 1.000 0.011 1a 1									30 Au Au30 -0.00000 0.50000 0.48437 1.000 0.000 1a 1
	31 Ag Ag31 0.25000 0.87500 0.05120 1.000 0.000 1a 1										31 Cu Cu31 0.87500 0.37355 0.26727 1.000 0.010 1a 1									31 Au Au31 0.35646 0.92823 0.08289 1.000 0.000 1a 1
	32 Ag Ag32 0.00000 0.87500 0.34832 1.000 0.000 1a 1										32 Cu Cu32 0.87500 0.12646 0.26727 1.000 0.010 1a 1									32 Au Au32 0.01388 0.75694 0.24348 1.000 0.000 1a 1
	33 Ag Ag33 0.00000 0.87500 0.05290 1.000 0.000 1a 1										33 Sn Sn33 0.12500 0.50000 0.04968 1.000 0.007 1a 1									33 Au Au33 0.17129 0.58565 0.40407 1.000 0.000 1a 1
	34 Ag Ag34 0.25000 0.87500 0.35001 1.000 0.000 1a 1										34 Sn Sn34 0.12500 0.50000 0.31358 1.000 0.008 1a 1									34 Sn Sn34 0.49458 0.74729 0.09627 1.000 0.000 1a 1
	35 Ag Ag35 0.12286 0.87500 0.19891 1.000 0.000 1a 1										35 Sn Sn35 0.37500 0.75000 0.13541 1.000 0.007 1a 1									35 Sn Sn35 0.15199 0.57600 0.25686 1.000 0.000 1a 1
	36 Ag Ag36 0.37286 0.87500 0.49603 1.000 0.000 1a 1										36 Sn Sn36 0.37500 0.75000 0.40105 1.000 0.009 1a 1									36 Sn Sn36 0.30941 0.90471 0.41746 1.000 0.000 1a 1
	37 Ag Ag37 0.25000 0.62500 0.14855 1.000 0.000 1a 1										37 Cu Cu37 0.37500 0.50000 0.40856 1.000 0.008 1a 1									37 Sn Sn37 0.21834 0.60917 0.06951 1.000 0.000 1a 1
	38 Ag Ag38 0.00000 0.62500 0.44566 1.000 0.000 1a 1										38 Cu Cu38 0.37500 0.50000 0.14460 1.000 0.012 1a 1									38 Sn Sn38 0.37576 0.93788 0.23010 1.000 0.000 1a 1
	39 Ag Ag39 0.37286 0.62500 0.00253 1.000 0.000 1a 1										39 Cu Cu39 0.12500 0.75000 0.04120 1.000 0.011 1a 1									39 Sn Sn39 0.03317 0.76659 0.39069 1.000 0.000 1a 1
	40 Ag Ag40 0.12286 0.62500 0.29965 1.000 0.000 1a 1										40 Cu Cu40 0.12500 0.75000 0.30864 1.000 0.008 1a 1									40 Au Au40 0.52775 0.51388 0.00259 1.000 0.000 1a 1
	41 Ag Ag41 0.12714 0.62500 0.00253 1.000 0.000 1a 1										41 Cu Cu41 0.12500 0.88040 0.44822 1.000 0.012 1a 1									41 Au Au41 0.68517 0.84258 0.16318 1.000 0.000 1a 1
	42 Ag Ag42 0.37714 0.62500 0.29965 1.000 0.000 1a 1										42 Cu Cu42 0.12500 0.87576 0.18315 1.000 0.010 1a 1									42 Au Au42 0.84258 0.67129 0.32378 1.000 0.000 1a 1
	43 Ag Ag43 0.50000 0.62500 0.15024 1.000 0.000 1a 1										43 Cu Cu43 0.37500 0.87392 0.00277 1.000 0.011 1a 1									43 Au Au43 0.50000 0.50000 0.48437 1.000 0.000 1a 1
	44 Ag Ag44 0.75000 0.62500 0.44736 1.000 0.000 1a 1										44 Cu Cu44 0.12500 0.61960 0.44822 1.000 0.012 1a 1									44 Au Au44 0.85646 0.92823 0.08289 1.000 0.000 1a 1
	45 Ag Ag45 0.75000 0.87500 0.05120 1.000 0.000 1a 1										45 Cu Cu45 0.12500 0.62424 0.18315 1.000 0.010 1a 1									45 Au Au45 0.51388 0.75694 0.24348 1.000 0.000 1a 1
	46 Ag Ag46 0.50000 0.87500 0.34832 1.000 0.000 1a 1										46 Cu Cu46 0.37500 0.62608 0.00277 1.000 0.011 1a 1									46 Au Au46 0.67129 0.58565 0.40407 1.000 0.000 1a 1
	47 Ag Ag47 0.50000 0.87500 0.05290 1.000 0.000 1a 1										47 Cu Cu47 0.37500 0.87355 0.26727 1.000 0.010 1a 1									47 Sn Sn47 0.99458 0.74729 0.09627 1.000 0.000 1a 1
	48 Ag Ag48 0.75000 0.87500 0.35001 1.000 0.000 1a 1										48 Cu Cu48 0.37500 0.62645 0.26727 1.000 0.010 1a 1									48 Sn Sn48 0.65199 0.57600 0.25686 1.000 0.000 1a 1
	49 Ag Ag49 0.62286 0.87500 0.19891 1.000 0.000 1a 1										49 Sn Sn49 0.62500 0.50000 0.04968 1.000 0.007 1a 1									49 Sn Sn49 0.80941 0.90471 0.41746 1.000 0.000 1a 1
	50 Ag Ag50 0.87286 0.87500 0.49603 1.000 0.000 1a 1										50 Sn Sn50 0.62500 0.50000 0.31358 1.000 0.008 1a 1									50 Sn Sn50 0.71834 0.60917 0.06951 1.000 0.000 1a 1
	51 Ag Ag51 0.75000 0.62500 0.14855 1.000 0.000 1a 1										51 Sn Sn51 0.87500 0.75000 0.13541 1.000 0.007 1a 1									51 Sn Sn51 0.87576 0.93788 0.23010 1.000 0.000 1a 1
	52 Ag Ag52 0.50000 0.62500 0.44566 1.000 0.000 1a 1										52 Sn Sn52 0.87500 0.75000 0.40105 1.000 0.009 1a 1									52 Sn Sn52 0.53317 0.76659 0.39069 1.000 0.000 1a 1
	53 Ag Ag53 0.87286 0.62500 0.00253 1.000 0.000 1a 1										53 Cu Cu53 0.87500 0.50000 0.40856 1.000 0.008 1a 1									53 C C53 -0.50002 0.46118 0.64019 1.000 0.000 1a 1
	54 Ag Ag54 0.62286 0.62500 0.29965 1.000 0.000 1a 1										54 Cu Cu54 0.87500 0.50000 0.14460 1.000 0.012 1a 1									54 O O54 -0.41520 0.48264 0.67823 1.000 0.000 1a 1
	55 Ag Ag55 0.62714 0.62500 0.00253 1.000 0.000 1a 1										55 Cu Cu55 0.62500 0.75000 0.04120 1.000 0.011 1a 1									55 O O55 -0.49820 0.47247 0.57782 1.000 0.000 1a 1
	56 Ag Ag56 0.87714 0.62500 0.29965 1.000 0.000 1a 1										56 Cu Cu56 0.62500 0.75000 0.30864 1.000 0.008 1a 1									56 H H56 -0.56954 0.43274 0.67206 1.000 0.000 1a 1
	57 Sn Sn1 0.37714 0.37500 0.19891 1.000 0.000 1a 1										57 Cu Cu57 0.62500 0.88040 0.44822 1.000 0.012 1a 1									57 H H57 -0.43234 0.46863 0.72744 1.000 0.000 1a 1
	58 Sn Sn2 0.12714 0.37500 0.49603 1.000 0.000 1a 1										58 Cu Cu58 0.62500 0.87576 0.18315 1.000 0.010 1a 1
	59 Sn Sn3 0.87714 0.37500 0.19891 1.000 0.000 1a 1										59 Cu Cu59 0.87500 0.87392 0.00277 1.000 0.011 1a 1
	60 Sn Sn4 0.62714 0.37500 0.49603 1.000 0.000 1a 1										60 Cu Cu60 0.62500 0.61960 0.44822 1.000 0.012 1a 1
	61 Sn Sn5 0.37714 0.87500 0.19891 1.000 0.000 1a 1										61 Cu Cu61 0.62500 0.62424 0.18315 1.000 0.010 1a 1
	62 Sn Sn6 0.12714 0.87500 0.49603 1.000 0.000 1a 1										62 Cu Cu62 0.87500 0.62608 0.00277 1.000 0.011 1a 1
	63 Sn Sn7 0.87714 0.87500 0.19891 1.000 0.000 1a 1										63 Cu Cu63 0.87500 0.87355 0.26727 1.000 0.010 1a 1
	64 Sn Sn8 0.62714 0.87500 0.49603 1.000 0.000 1a 1										64 Cu Cu64 0.87500 0.62645 0.26727 1.000 0.010 1a 1
	65 C C1 0.62747 0.40222 0.65459 1.000 0.000 1a 1										65 C C65 0.62960 0.38623 0.62432 1.000 0.000 1a 1
	66 O O1 0.71246 0.39876 0.69132 1.000 0.000 1a 1										66 O O66 0.65909 0.49148 0.66101 1.000 0.000 1a 1
	67 O O2 0.62668 0.38522 0.59410 1.000 0.000 1a 1										67 O O67 0.61057 0.38318 0.55803 1.000 0.000 1a 1
	68 H H1 0.56042 0.42193 0.68564 1.000 0.000 1a 1										68 H H68 0.62507 0.30528 0.66118 1.000 0.000 1a 1
	69 H H2 0.69764 0.41477 0.73908 1.000 0.000 1a 1										69 H H69 0.67075 0.47499 0.71401 1.000 0.000 1a 1

## Sheet: Figure·S16
a										c							e
	Lattice type P									Lattice type P								Lattice type P
	Space group name P 1									Space group name P 1								Space group name P 1
	Space group number 1									Space group number 1								Space group number 1
	Setting number 1									Setting number 1								Setting number 1
	Lattice parameters									Lattice parameters								Lattice parameters
	a b c alpha beta gamma									a b c alpha beta gamma								a b c alpha beta gamma
	13.54690 10.31120 19.74320 90.0000 90.0000 90.0000									8.66420 11.03920 18.03240 90.0000 90.0000 90.0000								14.02740 8.64600 19.29680 90.0000 90.0000 107.9498
	Unit-cell volume = 2757.824889 Å^3									Unit-cell volume = 1724.723936 Å^3								Unit-cell volume = 2226.422066 Å^3
	Structure parameters									Structure parameters								Structure parameters
	x y z Occ. U Site Sym.									x y z Occ. U Site Sym.								x y z Occ. U Site Sym.
	1 Ag Ag1 -0.00000 0.12500 0.15024 1.000 0.000 1a 1									1 Sn Sn1 0.12500 0.00000 0.04968 1.000 0.007 1a 1								1 Au Au1 0.02775 0.01388 0.00259 1.000 0.000 1a 1
	2 Ag Ag2 0.25000 0.12500 0.44736 1.000 0.000 1a 1									2 Sn Sn2 0.12500 0.00000 0.31358 1.000 0.008 1a 1								2 Au Au2 0.18517 0.34258 0.16318 1.000 0.000 1a 1
	3 Ag Ag3 0.25000 0.37500 0.05120 1.000 0.000 1a 1									3 Sn Sn3 0.37500 0.25000 0.13541 1.000 0.007 1a 1								3 Au Au3 0.34258 0.17129 0.32378 1.000 0.000 1a 1
	4 Ag Ag4 0.00000 0.37500 0.34832 1.000 0.000 1a 1									4 Sn Sn4 0.37500 0.25000 0.40105 1.000 0.009 1a 1								4 Au Au4 -0.00000 0.00000 0.48437 1.000 0.000 1a 1
	5 Ag Ag5 0.00000 0.37500 0.05290 1.000 0.000 1a 1									5 Cu Cu5 0.37500 0.00000 0.40856 1.000 0.008 1a 1								5 Au Au5 0.35646 0.42823 0.08289 1.000 0.000 1a 1
	6 Ag Ag6 0.25000 0.37500 0.35001 1.000 0.000 1a 1									6 Cu Cu6 0.37500 0.00000 0.14460 1.000 0.012 1a 1								6 Au Au6 0.01388 0.25694 0.24348 1.000 0.000 1a 1
	7 Ag Ag7 0.12286 0.37500 0.19891 1.000 0.000 1a 1									7 Cu Cu7 0.12500 0.25000 0.04120 1.000 0.011 1a 1								7 Au Au7 0.17129 0.08565 0.40407 1.000 0.000 1a 1
	8 Ag Ag8 0.37286 0.37500 0.49603 1.000 0.000 1a 1									8 Cu Cu8 0.12500 0.25000 0.30864 1.000 0.008 1a 1								8 Sn Sn8 0.49458 0.24729 0.09627 1.000 0.000 1a 1
	9 Ag Ag9 0.25000 0.12500 0.14855 1.000 0.000 1a 1									9 Cu Cu9 0.12500 0.38040 0.44822 1.000 0.012 1a 1								9 Sn Sn9 0.15199 0.07600 0.25686 1.000 0.000 1a 1
	10 Ag Ag10 -0.00000 0.12500 0.44566 1.000 0.000 1a 1									10 Cu Cu10 0.12500 0.37576 0.18315 1.000 0.010 1a 1								10 Sn Sn10 0.30941 0.40471 0.41746 1.000 0.000 1a 1
	11 Ag Ag11 0.37286 0.12500 0.00253 1.000 0.000 1a 1									11 Cu Cu11 0.37500 0.37392 0.00277 1.000 0.011 1a 1								11 Sn Sn11 0.21834 0.10917 0.06951 1.000 0.000 1a 1
	12 Ag Ag12 0.12286 0.12500 0.29965 1.000 0.000 1a 1									12 Cu Cu12 0.12500 0.11960 0.44822 1.000 0.012 1a 1								12 Sn Sn12 0.37576 0.43788 0.23010 1.000 0.000 1a 1
	13 Ag Ag13 0.12714 0.12500 0.00253 1.000 0.000 1a 1									13 Cu Cu13 0.12500 0.12424 0.18315 1.000 0.010 1a 1								13 Sn Sn13 0.03317 0.26659 0.39069 1.000 0.000 1a 1
	14 Ag Ag14 0.37714 0.12500 0.29965 1.000 0.000 1a 1									14 Cu Cu14 0.37500 0.12608 0.00277 1.000 0.011 1a 1								14 Au Au14 0.52775 0.01388 0.00259 1.000 0.000 1a 1
	15 Sn Sn15 0.37714 0.37500 0.19891 1.000 0.000 1a 1									15 Cu Cu15 0.37500 0.37355 0.26727 1.000 0.010 1a 1								15 Au Au15 0.68517 0.34258 0.16318 1.000 0.000 1a 1
	16 Sn Sn16 0.12714 0.37500 0.49603 1.000 0.000 1a 1									16 Cu Cu16 0.37500 0.12646 0.26727 1.000 0.010 1a 1								16 Au Au16 0.84258 0.17129 0.32378 1.000 0.000 1a 1
	17 Ag Ag17 0.50000 0.12500 0.15024 1.000 0.000 1a 1									17 Sn Sn17 0.62500 0.00000 0.04968 1.000 0.007 1a 1								17 Au Au17 0.50000 -0.00000 0.48437 1.000 0.000 1a 1
	18 Ag Ag18 0.75000 0.12500 0.44736 1.000 0.000 1a 1									18 Sn Sn18 0.62500 0.00000 0.31358 1.000 0.008 1a 1								18 Au Au18 0.85646 0.42823 0.08289 1.000 0.000 1a 1
	19 Ag Ag19 0.75000 0.37500 0.05120 1.000 0.000 1a 1									19 Sn Sn19 0.87500 0.25000 0.13541 1.000 0.007 1a 1								19 Au Au19 0.51388 0.25694 0.24348 1.000 0.000 1a 1
	20 Ag Ag20 0.50000 0.37500 0.34832 1.000 0.000 1a 1									20 Sn Sn20 0.87500 0.25000 0.40105 1.000 0.009 1a 1								20 Au Au20 0.67129 0.08565 0.40407 1.000 0.000 1a 1
	21 Ag Ag21 0.50000 0.37500 0.05290 1.000 0.000 1a 1									21 Cu Cu21 0.87500 0.00000 0.40856 1.000 0.008 1a 1								21 Sn Sn21 0.99458 0.24729 0.09627 1.000 0.000 1a 1
	22 Ag Ag22 0.75000 0.37500 0.35001 1.000 0.000 1a 1									22 Cu Cu22 0.87500 0.00000 0.14460 1.000 0.012 1a 1								22 Sn Sn22 0.65199 0.07600 0.25686 1.000 0.000 1a 1
	23 Ag Ag23 0.62286 0.37500 0.19891 1.000 0.000 1a 1									23 Cu Cu23 0.62500 0.25000 0.04120 1.000 0.011 1a 1								23 Sn Sn23 0.80941 0.40471 0.41746 1.000 0.000 1a 1
	24 Ag Ag24 0.87286 0.37500 0.49603 1.000 0.000 1a 1									24 Cu Cu24 0.62500 0.25000 0.30864 1.000 0.008 1a 1								24 Sn Sn24 0.71834 0.10917 0.06951 1.000 0.000 1a 1
	25 Ag Ag25 0.75000 0.12500 0.14855 1.000 0.000 1a 1									25 Cu Cu25 0.62500 0.38040 0.44822 1.000 0.012 1a 1								25 Sn Sn25 0.87576 0.43788 0.23010 1.000 0.000 1a 1
	26 Ag Ag26 0.50000 0.12500 0.44566 1.000 0.000 1a 1									26 Cu Cu26 0.62500 0.37576 0.18315 1.000 0.010 1a 1								26 Sn Sn26 0.53317 0.26659 0.39069 1.000 0.000 1a 1
	27 Ag Ag27 0.87286 0.12500 0.00253 1.000 0.000 1a 1									27 Cu Cu27 0.87500 0.37392 0.00277 1.000 0.011 1a 1								27 Au Au27 0.02775 0.51388 0.00259 1.000 0.000 1a 1
	28 Ag Ag28 0.62286 0.12500 0.29965 1.000 0.000 1a 1									28 Cu Cu28 0.62500 0.11960 0.44822 1.000 0.012 1a 1								28 Au Au28 0.18517 0.84258 0.16318 1.000 0.000 1a 1
	29 Ag Ag29 0.62714 0.12500 0.00253 1.000 0.000 1a 1									29 Cu Cu29 0.62500 0.12424 0.18315 1.000 0.010 1a 1								29 Au Au29 0.34258 0.67129 0.32378 1.000 0.000 1a 1
	30 Ag Ag30 0.87714 0.12500 0.29965 1.000 0.000 1a 1									30 Cu Cu30 0.87500 0.12608 0.00277 1.000 0.011 1a 1								30 Au Au30 -0.00000 0.50000 0.48437 1.000 0.000 1a 1
	31 Sn Sn31 0.87714 0.37500 0.19891 1.000 0.000 1a 1									31 Cu Cu31 0.87500 0.37355 0.26727 1.000 0.010 1a 1								31 Au Au31 0.35646 0.92823 0.08289 1.000 0.000 1a 1
	32 Sn Sn32 0.62714 0.37500 0.49603 1.000 0.000 1a 1									32 Cu Cu32 0.87500 0.12646 0.26727 1.000 0.010 1a 1								32 Au Au32 0.01388 0.75694 0.24348 1.000 0.000 1a 1
	33 Ag Ag33 -0.00000 0.62500 0.15024 1.000 0.000 1a 1									33 Sn Sn33 0.12500 0.50000 0.04968 1.000 0.007 1a 1								33 Au Au33 0.17129 0.58565 0.40407 1.000 0.000 1a 1
	34 Ag Ag34 0.25000 0.62500 0.44736 1.000 0.000 1a 1									34 Sn Sn34 0.12500 0.50000 0.31358 1.000 0.008 1a 1								34 Sn Sn34 0.49458 0.74729 0.09627 1.000 0.000 1a 1
	35 Ag Ag35 0.25000 0.87500 0.05120 1.000 0.000 1a 1									35 Sn Sn35 0.37500 0.75000 0.13541 1.000 0.007 1a 1								35 Sn Sn35 0.15199 0.57600 0.25686 1.000 0.000 1a 1
	36 Ag Ag36 0.00000 0.87500 0.34832 1.000 0.000 1a 1									36 Sn Sn36 0.37500 0.75000 0.40105 1.000 0.009 1a 1								36 Sn Sn36 0.30941 0.90471 0.41746 1.000 0.000 1a 1
	37 Ag Ag37 0.00000 0.87500 0.05290 1.000 0.000 1a 1									37 Cu Cu37 0.37500 0.50000 0.40856 1.000 0.008 1a 1								37 Sn Sn37 0.21834 0.60917 0.06951 1.000 0.000 1a 1
	38 Ag Ag38 0.25000 0.87500 0.35001 1.000 0.000 1a 1									38 Cu Cu38 0.37500 0.50000 0.14460 1.000 0.012 1a 1								38 Sn Sn38 0.37576 0.93788 0.23010 1.000 0.000 1a 1
	39 Ag Ag39 0.12286 0.87500 0.19891 1.000 0.000 1a 1									39 Cu Cu39 0.12500 0.75000 0.04120 1.000 0.011 1a 1								39 Sn Sn39 0.03317 0.76659 0.39069 1.000 0.000 1a 1
	40 Ag Ag40 0.37286 0.87500 0.49603 1.000 0.000 1a 1									40 Cu Cu40 0.12500 0.75000 0.30864 1.000 0.008 1a 1								40 Au Au40 0.52775 0.51388 0.00259 1.000 0.000 1a 1
	41 Ag Ag41 0.25000 0.62500 0.14855 1.000 0.000 1a 1									41 Cu Cu41 0.12500 0.88040 0.44822 1.000 0.012 1a 1								41 Au Au41 0.68517 0.84258 0.16318 1.000 0.000 1a 1
	42 Ag Ag42 -0.00000 0.62500 0.44566 1.000 0.000 1a 1									42 Cu Cu42 0.12500 0.87576 0.18315 1.000 0.010 1a 1								42 Au Au42 0.84258 0.67129 0.32378 1.000 0.000 1a 1
	43 Ag Ag43 0.37286 0.62500 0.00253 1.000 0.000 1a 1									43 Cu Cu43 0.37500 0.87392 0.00277 1.000 0.011 1a 1								43 Au Au43 0.50000 0.50000 0.48437 1.000 0.000 1a 1
	44 Ag Ag44 0.12286 0.62500 0.29965 1.000 0.000 1a 1									44 Cu Cu44 0.12500 0.61960 0.44822 1.000 0.012 1a 1								44 Au Au44 0.85646 0.92823 0.08289 1.000 0.000 1a 1
	45 Ag Ag45 0.12714 0.62500 0.00253 1.000 0.000 1a 1									45 Cu Cu45 0.12500 0.62424 0.18315 1.000 0.010 1a 1								45 Au Au45 0.51388 0.75694 0.24348 1.000 0.000 1a 1
	46 Ag Ag46 0.37714 0.62500 0.29965 1.000 0.000 1a 1									46 Cu Cu46 0.37500 0.62608 0.00277 1.000 0.011 1a 1								46 Au Au46 0.67129 0.58565 0.40407 1.000 0.000 1a 1
	47 Sn Sn47 0.37714 0.87500 0.19891 1.000 0.000 1a 1									47 Cu Cu47 0.37500 0.87355 0.26727 1.000 0.010 1a 1								47 Sn Sn47 0.99458 0.74729 0.09627 1.000 0.000 1a 1
	48 Sn Sn48 0.12714 0.87500 0.49603 1.000 0.000 1a 1									48 Cu Cu48 0.37500 0.62645 0.26727 1.000 0.010 1a 1								48 Sn Sn48 0.65199 0.57600 0.25686 1.000 0.000 1a 1
	49 Ag Ag49 0.50000 0.62500 0.15024 1.000 0.000 1a 1									49 Sn Sn49 0.62500 0.50000 0.04968 1.000 0.007 1a 1								49 Sn Sn49 0.80941 0.90471 0.41746 1.000 0.000 1a 1
	50 Ag Ag50 0.75000 0.62500 0.44736 1.000 0.000 1a 1									50 Sn Sn50 0.62500 0.50000 0.31358 1.000 0.008 1a 1								50 Sn Sn50 0.71834 0.60917 0.06951 1.000 0.000 1a 1
	51 Ag Ag51 0.75000 0.87500 0.05120 1.000 0.000 1a 1									51 Sn Sn51 0.87500 0.75000 0.13541 1.000 0.007 1a 1								51 Sn Sn51 0.87576 0.93788 0.23010 1.000 0.000 1a 1
	52 Ag Ag52 0.50000 0.87500 0.34832 1.000 0.000 1a 1									52 Sn Sn52 0.87500 0.75000 0.40105 1.000 0.009 1a 1								52 Sn Sn52 0.53317 0.76659 0.39069 1.000 0.000 1a 1
	53 Ag Ag53 0.50000 0.87500 0.05290 1.000 0.000 1a 1									53 Cu Cu53 0.87500 0.50000 0.40856 1.000 0.008 1a 1								53 H H53 0.49081 0.50199 0.56595 1.000 0.000 1a 1
	54 Ag Ag54 0.75000 0.87500 0.35001 1.000 0.000 1a 1									54 Cu Cu54 0.87500 0.50000 0.14460 1.000 0.012 1a 1
	55 Ag Ag55 0.62286 0.87500 0.19891 1.000 0.000 1a 1									55 Cu Cu55 0.62500 0.75000 0.04120 1.000 0.011 1a 1
	56 Ag Ag56 0.87286 0.87500 0.49603 1.000 0.000 1a 1									56 Cu Cu56 0.62500 0.75000 0.30864 1.000 0.008 1a 1
	57 Ag Ag57 0.75000 0.62500 0.14855 1.000 0.000 1a 1									57 Cu Cu57 0.62500 0.88040 0.44822 1.000 0.012 1a 1
	58 Ag Ag58 0.50000 0.62500 0.44566 1.000 0.000 1a 1									58 Cu Cu58 0.62500 0.87576 0.18315 1.000 0.010 1a 1
	59 Ag Ag59 0.87286 0.62500 0.00253 1.000 0.000 1a 1									59 Cu Cu59 0.87500 0.87392 0.00277 1.000 0.011 1a 1
	60 Ag Ag60 0.62286 0.62500 0.29965 1.000 0.000 1a 1									60 Cu Cu60 0.62500 0.61960 0.44822 1.000 0.012 1a 1
	61 Ag Ag61 0.62714 0.62500 0.00253 1.000 0.000 1a 1									61 Cu Cu61 0.62500 0.62424 0.18315 1.000 0.010 1a 1
	62 Ag Ag62 0.87714 0.62500 0.29965 1.000 0.000 1a 1									62 Cu Cu62 0.87500 0.62608 0.00277 1.000 0.011 1a 1
	63 Sn Sn63 0.87714 0.87500 0.19891 1.000 0.000 1a 1									63 Cu Cu63 0.87500 0.87355 0.26727 1.000 0.010 1a 1
	64 Sn Sn64 0.62714 0.87500 0.49603 1.000 0.000 1a 1									64 Cu Cu64 0.87500 0.62645 0.26727 1.000 0.010 1a 1
	65 H H65 0.61937 0.39052 0.58515 1.000 0.000 1a 1									65 H H65 0.63775 0.38405 0.53559 1.000 0.000 1a 1
